# Supplementary material
Source: MDPI journal article supplement (https://www.mdpi.com/2673-8007/3/1/21)
Supplement: s1 [file s1 › applmicrobiol-2155144-SI.pdf]

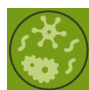

Supplementary materials

# Do the culturable microbial groups present in cutaway bogs change according to temporal variation? Pilot study based on the midlands in the Republic of Ireland

Gouri Nilakshika Atapattu <sup>1,2</sup>, Tara Battersby <sup>2</sup>, Michelle Giltrap<sup>1,3</sup>, Furong Tian <sup>1,3,\*</sup>

<sup>1</sup> School of Food Science Environmental Health, Technological University Dublin, City Campus, Grangegorman, D07ADY7, Dublin, Ireland

<sup>2</sup> Environmental Sustainability and Health Institute, Technological University Dublin, City Campus, Grangegorman, D07ADY7, Dublin, Ireland

<sup>3</sup> FOCAS Research Institute, Technological University Dublin, City Campus, Camden Row, D08CKP1, Dublin, Ireland.

\* Correspondence: furong.tian@tudublin.ie

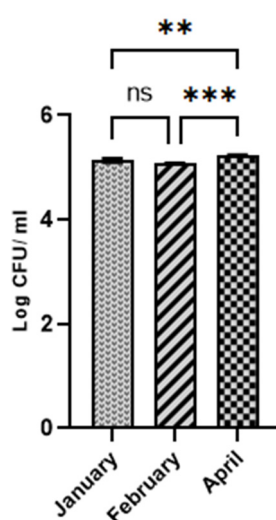

**Figure S1.** Number of aerobic bacteria across three cutaway sites cultured in three different time periods, ns, not significant ( $p > 0.05$ );  $**p \leq 0.01$   $***p \leq 0.001$ .

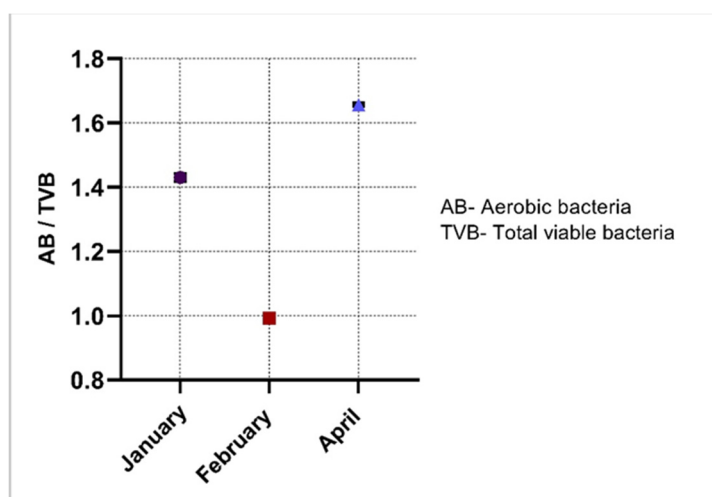

**Figure S2.** The ratio of aerobic bacteria to total viable bacteria in cutaway bogs in three time periods.
